# Supplementary material for: Molecular Characterization of Cultivated Bromeliad Accessions with Inter-Simple Sequence Repeat (ISSR) Markers
Source: Int J Mol Sci. 2012 May 18;13(5):6040–52. doi: 10.3390/ijms13056040 (PMC3382752; doi:10.3390/ijms13056040)
Supplement: Supplementary file 1 [file ijms-13-06040-s001.xls]

## Sheet: Similarity matrix
Electronic supplementary material: Jaccard similarity matrix for the 40 accessions of cultivated bromeliads. The accession codes refer to Table1.
	N3	N22	N107	N156	N4	N4-1	G1	G8	G26	G35	G40	G47	G54	G63	V5	V6	V7	V8	V9	V11	V12	V13	V21	V48	A5	A6	A36	A38	A39	A42	A51	A54	A50	A65	S1	S2	S3	S4	S5	S6
N3		0.36667	0.6	0.89474	0.6	0.57971	0.22892	0.11842	0.22093	0.20482	0.25	0.20238	0.24706	0.2619	0.21795	0.2973	0.22093	0.27381	0.20225	0.19481	0.16867	0.19753	0.24675	0.19231	0.16667	0.19231	0.24658	0.2987	0.20548	0.20779	0.20833	0.24658	0.16438	0.17143	0.16667	0.27273	0.23881	0.21538	0.23529	0.27536
N22			0.37363	0.35955	0.45349	0.45238	0.23656	0.12644	0.22917	0.22826	0.29474	0.25275	0.2268	0.27957	0.25581	0.23864	0.2967	0.33333	0.2766	0.19318	0.20879	0.23596	0.25287	0.24706	0.19355	0.23256	0.26829	0.21505	0.16092	0.16484	0.19048	0.22353	0.19512	0.17284	0.15385	0.21978	0.17073	0.16456	0.18293	0.18824
N107				0.61765	0.54054	0.52055	0.25301	0.17568	0.25882	0.25926	0.25843	0.22619	0.3012	0.27059	0.16867	0.27273	0.22989	0.25287	0.21111	0.18987	0.17857	0.20732	0.28947	0.25	0.25	0.25	0.29167	0.29114	0.25	0.20253	0.27143	0.29167	0.22535	0.1831	0.19697	0.33333	0.26866	0.22727	0.24638	0.26761
N156					0.61765	0.57353	0.25	0.13699	0.22619	0.20988	0.27059	0.2375	0.26829	0.26829	0.22368	0.30556	0.22619	0.28049	0.2069	0.2	0.15854	0.20253	0.25333	0.19737	0.17073	0.19737	0.21918	0.30667	0.22857	0.22973	0.23188	0.27143	0.16901	0.15942	0.19048	0.2973	0.26563	0.22222	0.26154	0.28358
N4						0.88136	0.25301	0.10127	0.24419	0.2439	0.31765	0.2561	0.27059	0.27059	0.25974	0.32432	0.25882	0.34568	0.25287	0.20513	0.2375	0.26923	0.36111	0.25	0.23457	0.23377	0.32857	0.25926	0.26761	0.30137	0.30882	0.30986	0.22535	0.2	0.23438	0.35135	0.26866	0.22727	0.26471	0.30435
N4-1							0.23171	0.07692	0.22353	0.20732	0.28235	0.25	0.26506	0.26506	0.25333	0.30137	0.25301	0.30864	0.2619	0.19737	0.23077	0.26316	0.31944	0.29577	0.22785	0.24324	0.32353	0.25316	0.24286	0.26027	0.30303	0.32353	0.21739	0.20896	0.20635	0.29333	0.24242	0.21875	0.23881	0.26087
G1								0.32759	0.4697	0.4375	0.5	0.45313	0.60656	0.4	0.27941	0.35385	0.27632	0.32	0.30263	0.23529	0.2027	0.27143	0.29412	0.25	0.18421	0.25	0.29688	0.24324	0.19403	0.26866	0.31667	0.27692	0.28333	0.15625	0.21053	0.34328	0.22951	0.20339	0.22581	0.26984
G8									0.37931	0.2931	0.34921	0.31034	0.35	0.28571	0.22807	0.14516	0.15942	0.17143	0.18841	0.13559	0.125	0.22034	0.20339	0.13333	0.17742	0.19298	0.11864	0.15385	0.10526	0.09677	0.12727	0.13793	0.17647	0.07547	0.13043	0.19672	0.11538	0.14894	0.13462	0.14545
G26										0.46154	0.5	0.3913	0.44286	0.48529	0.28571	0.3	0.28205	0.30769	0.32468	0.19178	0.17949	0.29577	0.28169	0.20548	0.25676	0.29412	0.28358	0.26667	0.22059	0.29412	0.26154	0.22857	0.31148	0.18462	0.22034	0.38806	0.2	0.21311	0.23438	0.27692
G35											0.44928	0.42188	0.37143	0.37143	0.25	0.22857	0.26667	0.34722	0.22785	0.18841	0.16	0.20833	0.24638	0.13699	0.18919	0.23881	0.28571	0.18421	0.14706	0.15278	0.22222	0.17391	0.20968	0.10769	0.15517	0.27536	0.17742	0.15	0.13846	0.21875
G40												0.40278	0.53623	0.55882	0.35714	0.35211	0.3125	0.44595	0.3375	0.21053	0.2125	0.32877	0.28	0.24	0.16667	0.30986	0.35821	0.20482	0.18919	0.25676	0.27941	0.22973	0.26866	0.15493	0.16667	0.36111	0.18571	0.19697	0.21739	0.27536
G47													0.4697	0.3662	0.28358	0.29851	0.28	0.32432	0.30667	0.23881	0.23944	0.25714	0.26087	0.21739	0.23611	0.27273	0.22388	0.18182	0.12857	0.2	0.3	0.26154	0.2459	0.17742	0.19298	0.27143	0.21311	0.14754	0.19048	0.23438
G54														0.45714	0.26389	0.33333	0.24691	0.32051	0.3038	0.20548	0.17722	0.29167	0.24324	0.21918	0.18987	0.30882	0.27941	0.24675	0.2	0.23611	0.25758	0.27941	0.28571	0.14706	0.17742	0.32394	0.23438	0.25	0.26984	0.29231
G63															0.26389	0.33333	0.36486	0.37333	0.41096	0.25714	0.19231	0.25676	0.24324	0.17105	0.16049	0.28986	0.26087	0.26316	0.23529	0.23611	0.31746	0.29851	0.32787	0.21875	0.21667	0.38235	0.23438	0.27119	0.31148	0.35484
V5																0.47273	0.32353	0.4375	0.39394	0.35088	0.38983	0.41379	0.32787	0.27869	0.18571	0.2381	0.33333	0.19718	0.14063	0.27869	0.30909	0.33333	0.2963	0.19643	0.24	0.27692	0.25926	0.2549	0.25455	0.23729
V6																	0.4	0.45313	0.34783	0.39286	0.31746	0.40678	0.38983	0.33898	0.2	0.25397	0.28333	0.30303	0.21311	0.31667	0.37736	0.30508	0.42	0.30769	0.26	0.4	0.35294	0.3	0.4	0.37037
V7																		0.52239	0.45714	0.40323	0.37313	0.46032	0.37879	0.35385	0.25676	0.29412	0.28358	0.33803	0.22059	0.29412	0.32258	0.30303	0.31148	0.24194	0.24138	0.29167	0.3	0.27586	0.29508	0.31746
V8																			0.44444	0.39063	0.38235	0.40299	0.32857	0.25	0.26667	0.25	0.35385	0.31081	0.18056	0.32353	0.35484	0.33333	0.36667	0.27419	0.27586	0.37681	0.31148	0.28814	0.28571	0.37097
V9																				0.48333	0.40299	0.44615	0.29167	0.26761	0.21795	0.23288	0.27536	0.29333	0.30769	0.36364	0.35484	0.31343	0.34426	0.21538	0.27586	0.35714	0.29032	0.26667	0.30645	0.28788
V11																					0.51923	0.43636	0.32203	0.27119	0.23077	0.27119	0.21667	0.34426	0.25	0.22951	0.25455	0.2807	0.28846	0.28	0.31111	0.29032	0.32653	0.29787	0.34694	0.34615
V12																						0.52727	0.48214	0.31148	0.28788	0.26984	0.2381	0.29851	0.25	0.25	0.27586	0.3	0.35849	0.30189	0.30612	0.26866	0.2963	0.26923	0.26786	0.2931
V13																							0.48214	0.33333	0.32813	0.26984	0.21875	0.26087	0.20968	0.21212	0.27586	0.2381	0.38462	0.21053	0.2549	0.32813	0.25	0.24528	0.29091	0.27119
V21																								0.38596	0.29231	0.25397	0.28333	0.26471	0.27586	0.25397	0.32727	0.30508	0.29091	0.30769	0.28571	0.33333	0.27778	0.25	0.25	0.34545
V48																									0.30645	0.20635	0.27586	0.2029	0.20339	0.15152	0.25	0.21311	0.23636	0.18182	0.17647	0.20896	0.22222	0.19231	0.21818	0.22414
A5																										0.17391	0.21538	0.375	0.26667	0.20896	0.22951	0.25397	0.2807	0.2963	0.22642	0.24638	0.24561	0.17544	0.2	0.22581
A6																											0.34545	0.25758	0.24561	0.2459	0.2069	0.25424	0.21429	0.25	0.30435	0.26563	0.24528	0.31915	0.26415	0.31481
A36																												0.24615	0.32692	0.27586	0.36	0.30909	0.29412	0.21154	0.34884	0.33898	0.33333	0.33333	0.32653	0.40816
A38																													0.36842	0.31746	0.20313	0.22727	0.25	0.26316	0.26415	0.29412	0.35185	0.25455	0.29825	0.34483
A39																														0.26786	0.25	0.25455	0.21154	0.2	0.41026	0.33333	0.29787	0.32558	0.31915	0.32
A42																															0.42857	0.29825	0.28302	0.27451	0.30435	0.32787	0.32	0.31915	0.26415	0.33962
A51																																0.54545	0.40909	0.31111	0.38462	0.33929	0.36364	0.30233	0.32609	0.35417
A54																																	0.40426	0.23529	0.38095	0.31667	0.3913	0.36364	0.38298	0.38
A50																																		0.32558	0.33333	0.37736	0.26087	0.35	0.37209	0.34043
A65																																			0.32432	0.2963	0.27907	0.2439	0.27273	0.2766
S1																																				0.47727	0.51515	0.53333	0.45714	0.44737
S2																																					0.42	0.42553	0.5	0.52
S3																																						0.57576	0.62857	0.5641
S4																																							0.65625	0.62857
S5																																								0.72222
S6
